# Supplementary material for: Comprehensive exploration of long-wave emission carbon dots for brain tumor visualization
Source: Royal Society of Chemistry journal article supplement (doi:10.1039/d2tb00322h), 2022-01-01
Supplement: d2tb00322h1.pdf [file d2tb00322h1.pdf]

## **Comprehensive exploration of long-wave emission carbon dots for brain tumor visualization**

Yifan Zhao<sup>1,2</sup>, Yandong Xie<sup>3</sup>, Yuyang Liu<sup>3</sup>, Xianglong Tang<sup>3\*</sup>, Sheng Cui<sup>1,2,4\*</sup>

*1 State Key Laboratory of Materials-Oriented Chemical Engineering, College of Material Science and Engineering, Nanjing Tech University, Nanjing 211816, China;*

*2 Jiangsu Collaborative Innovation Center for Advanced Inorganic Function Composites, Nanjing Tech University, Nanjing 211816, China;*

*3 Department of Neuro-Psychiatric Institute, the Affiliated Brain Hospital with Nanjing Medical University, Nanjing, 210029, China;*

*4 Institute of Electronic and Photonic Materials of Light Industry, Research Institute of Electric Light Source Materials, Nanjing Tech University, Nanjing 210009, China;*

**\*Corresponding Author**

**Sheng Cui** E-mail address: [scui@njtech.edu.cn](mailto:scui@njtech.edu.cn)

**Xianglong Tang** E-mail address: [xltang0326@163.com](mailto:xltang0326@163.com)

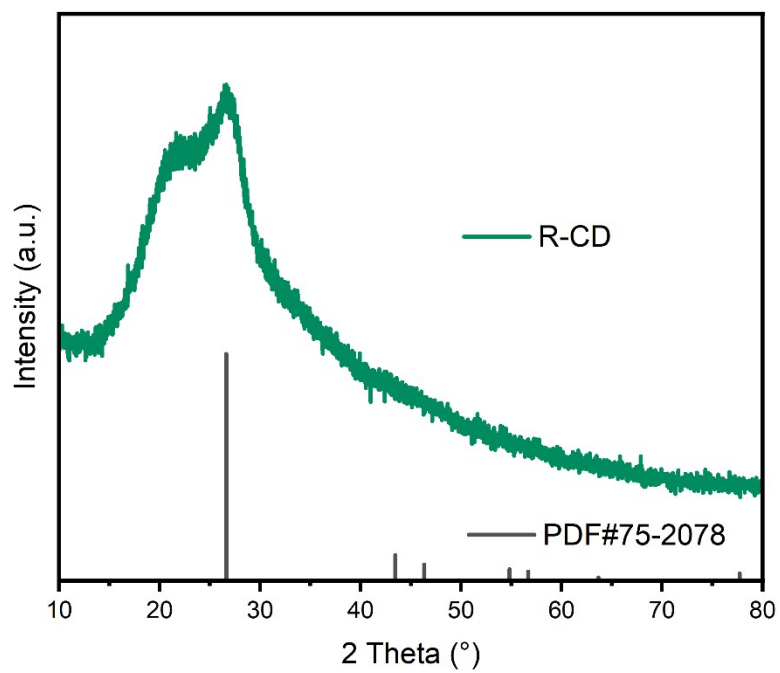

**Figure S1 XRD pattern of R-CD**

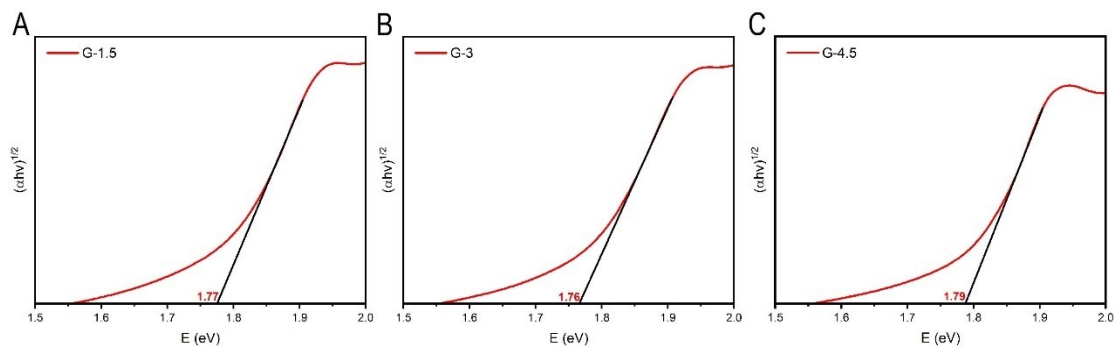

**Figure S2 Bandgap of G-1.5, G-3, and G-4.5**

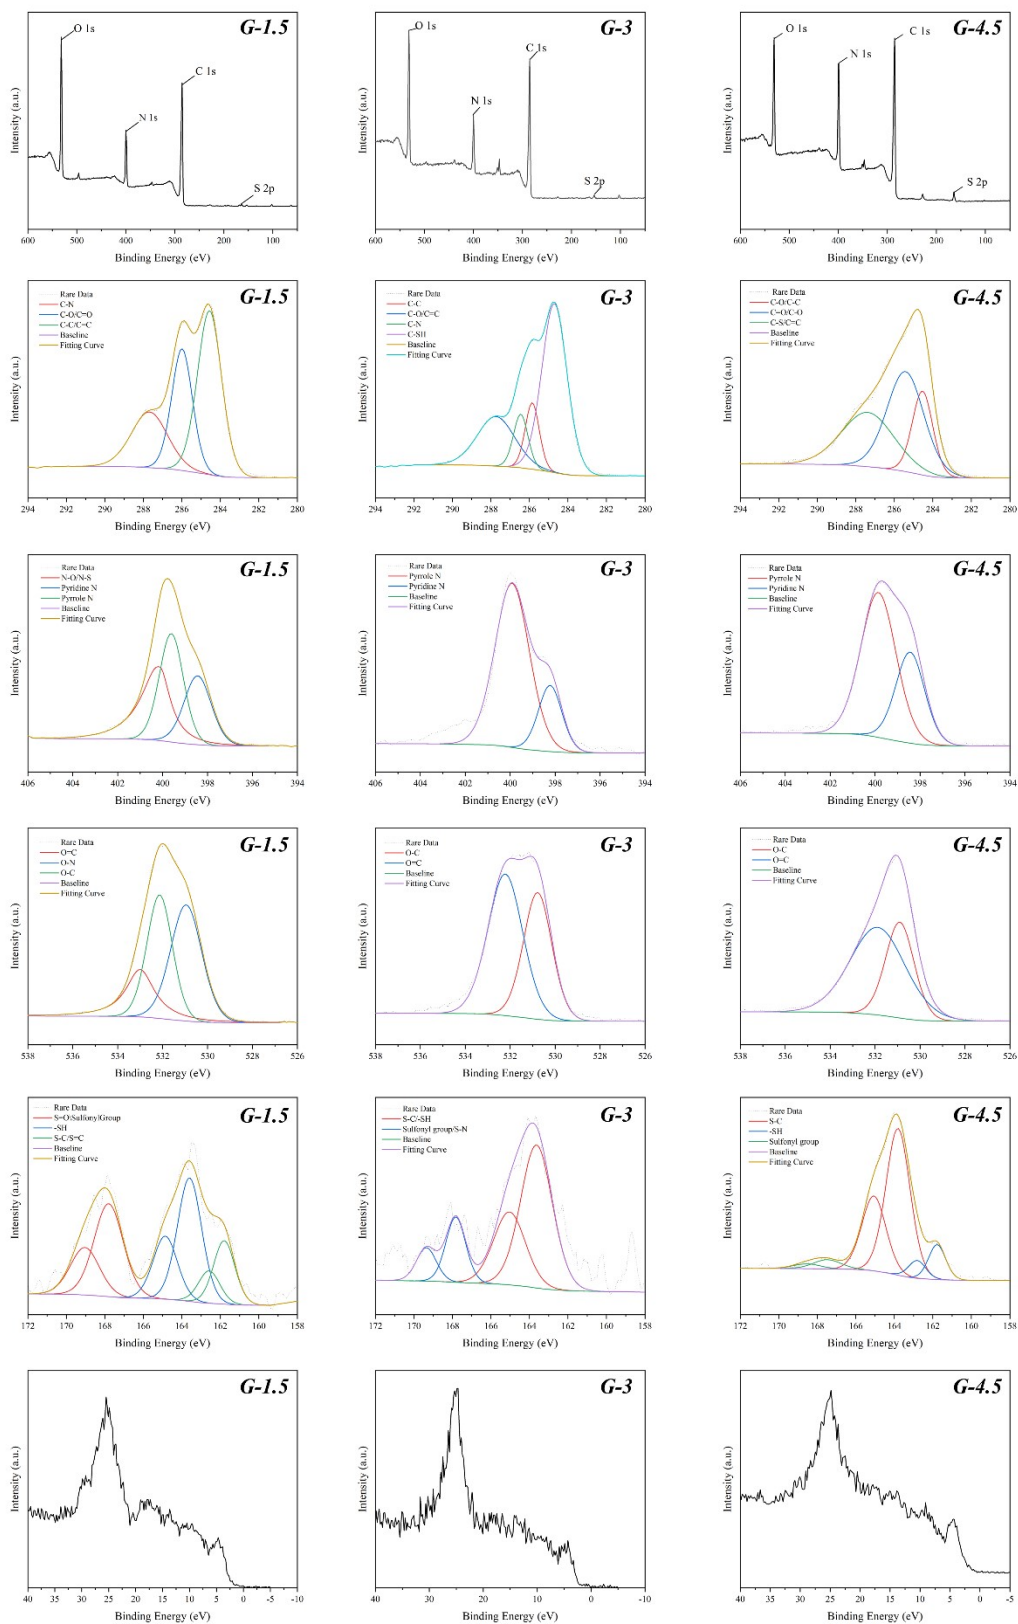

**Figure S3 XPS spectra of G-1.5, G-3, and G-4.5 (Top: Survey spectrum, C 1s, N 1s, O 1s, S 2p, VB)**

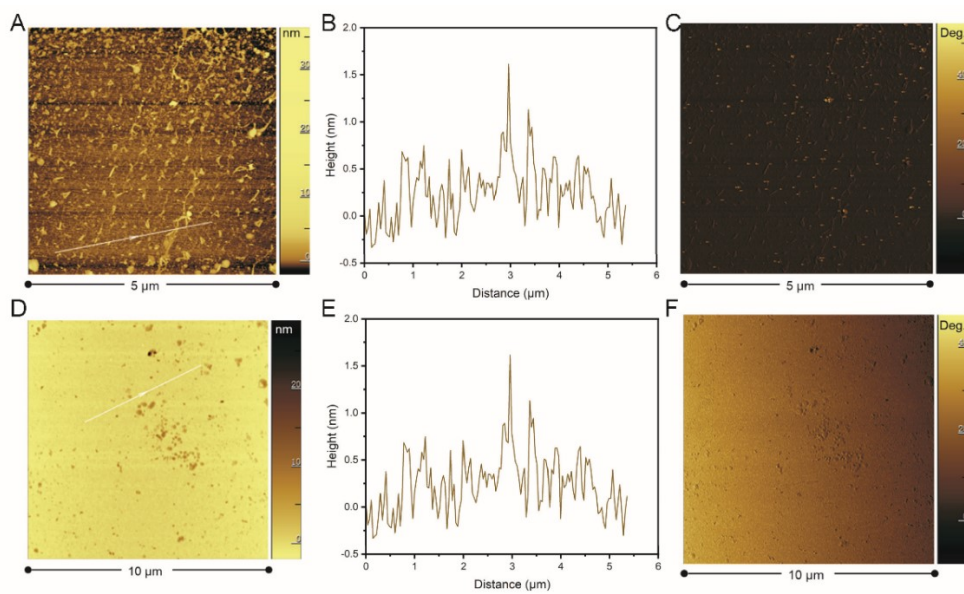

**Figure S4 Typical AFM tapping mode images of R-CD with scanning probes of 7 nm (A, B, C) and 2 nm (D, E, F)**

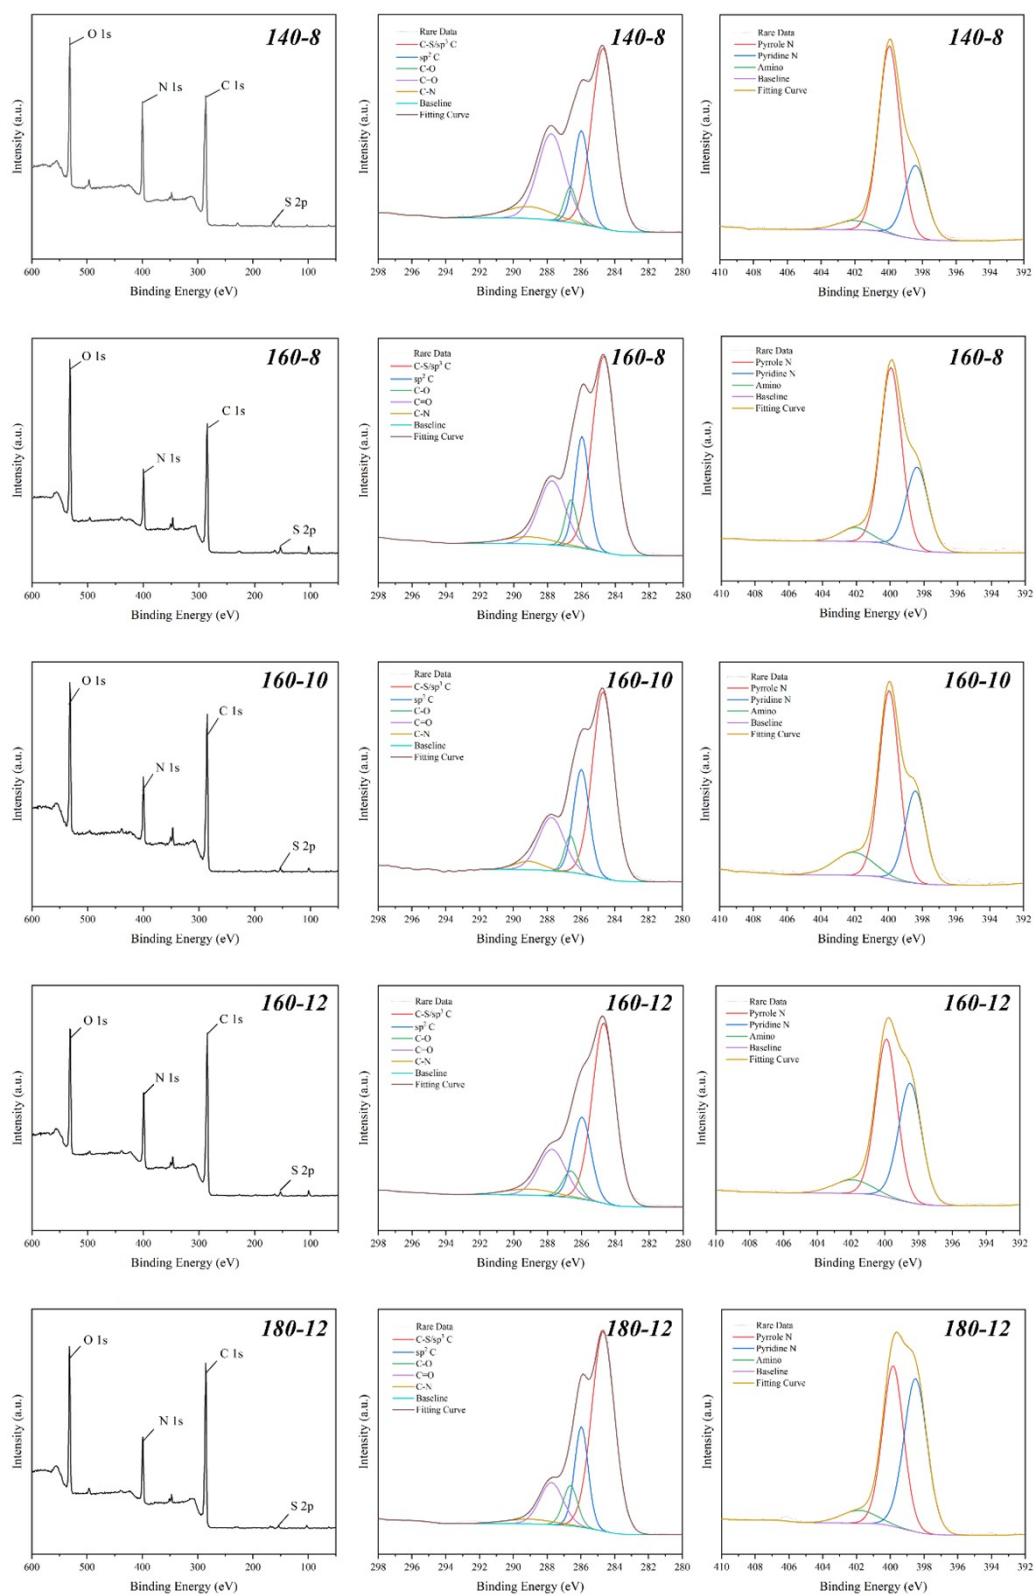

**Figure S5 (A) XPS spectra of R-CD under different synthetic conditions (Left: Survey spectrum, C 1s, N 1s)**

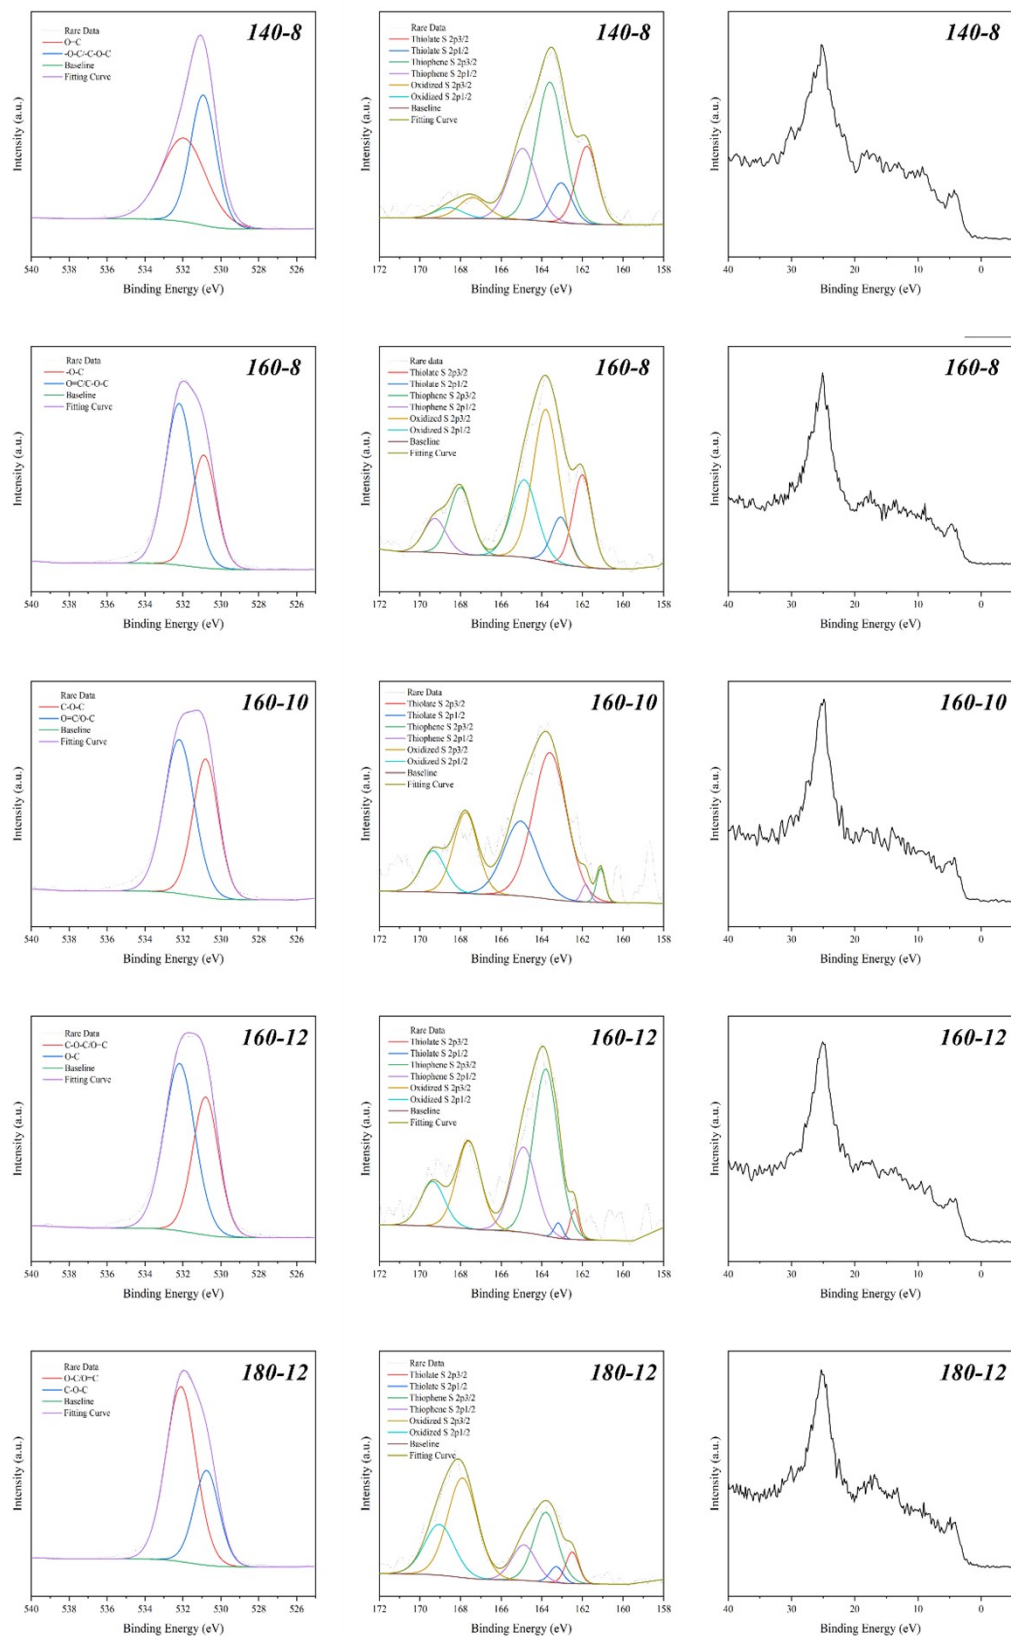

**Figure S5 (B) XPS spectra of R-CD under different synthetic conditions (Left: O 1s, S 2p, VB)**

**Table S1 Element composition ratio and XPS valence band**

|               | <b>C</b> | <b>N</b> | <b>O</b> | <b>S</b> | <b>VB/HOMO</b> |
|---------------|----------|----------|----------|----------|----------------|
| <b>140-8</b>  | 62.12%   | 18.21%   | 18.45%   | 1.23%    | 2.28 eV        |
| <b>160-8</b>  | 62.14%   | 13.53%   | 23.40%   | 0.93%    | 2.55 eV        |
| <b>160-10</b> | 66.89%   | 11.84%   | 20.71%   | 0.56%    | 2.59 eV        |
| <b>160-12</b> | 63.93%   | 16.87%   | 18.74%   | 0.47%    | 2.45 eV        |
| <b>180-12</b> | 63.59%   | 15.28%   | 20.45%   | 0.67%    | 2.66 eV        |

**Table S2 XPS analysis of C 1s**

|               | <b>sp<sup>3</sup> C</b> | <b>sp<sup>2</sup> C</b> | <b>C-O</b> | <b>C=O</b> | <b>C-N</b> |
|---------------|-------------------------|-------------------------|------------|------------|------------|
| <b>140-8</b>  | 46.51%                  | 15.81%                  | 4.65%      | 26.51%     | 6.51%      |
| <b>160-8</b>  | 52.36%                  | 18.32%                  | 6.28%      | 19.37%     | 3.66%      |
| <b>160-10</b> | 52.08%                  | 21.35%                  | 5.73%      | 17.71%     | 3.13%      |
| <b>160-12</b> | 54.05%                  | 19.46%                  | 5.95%      | 16.76%     | 3.78%      |
| <b>180-12</b> | 59.17%                  | 17.75%                  | 7.69%      | 12.43%     | 2.96%      |

**Table S3 XPS analysis of N 1s**

|               | <b>Pyrrole N</b> | <b>Pyridine N</b> | <b>Amino</b> |
|---------------|------------------|-------------------|--------------|
| <b>140-8</b>  | 67.30%           | 26.96%            | 5.74%        |
| <b>160-8</b>  | 62.03%           | 30.54%            | 7.43%        |
| <b>160-10</b> | 64.38%           | 28.02%            | 7.60%        |
| <b>160-12</b> | 55.17%           | 39.44%            | 5.38%        |
| <b>180-12</b> | 40.44%           | 55.41%            | 4.15%        |

**Table S4 XPS analysis of S 2p**

|               | <b>Thiolate S</b> | <b>Thiophene S</b> | <b>Oxidized S</b> |
|---------------|-------------------|--------------------|-------------------|
| <b>140-8</b>  | 27.20%            | 63.18%             | 9.62%             |
| <b>160-8</b>  | 24.64%            | 20.65%             | 54.71%            |
| <b>160-10</b> | 68.64%            | 4.55%              | 26.82%            |
| <b>160-12</b> | 3.81%             | 63.98%             | 32.20%            |
| <b>180-12</b> | 8.08%             | 33.85%             | 58.08%            |



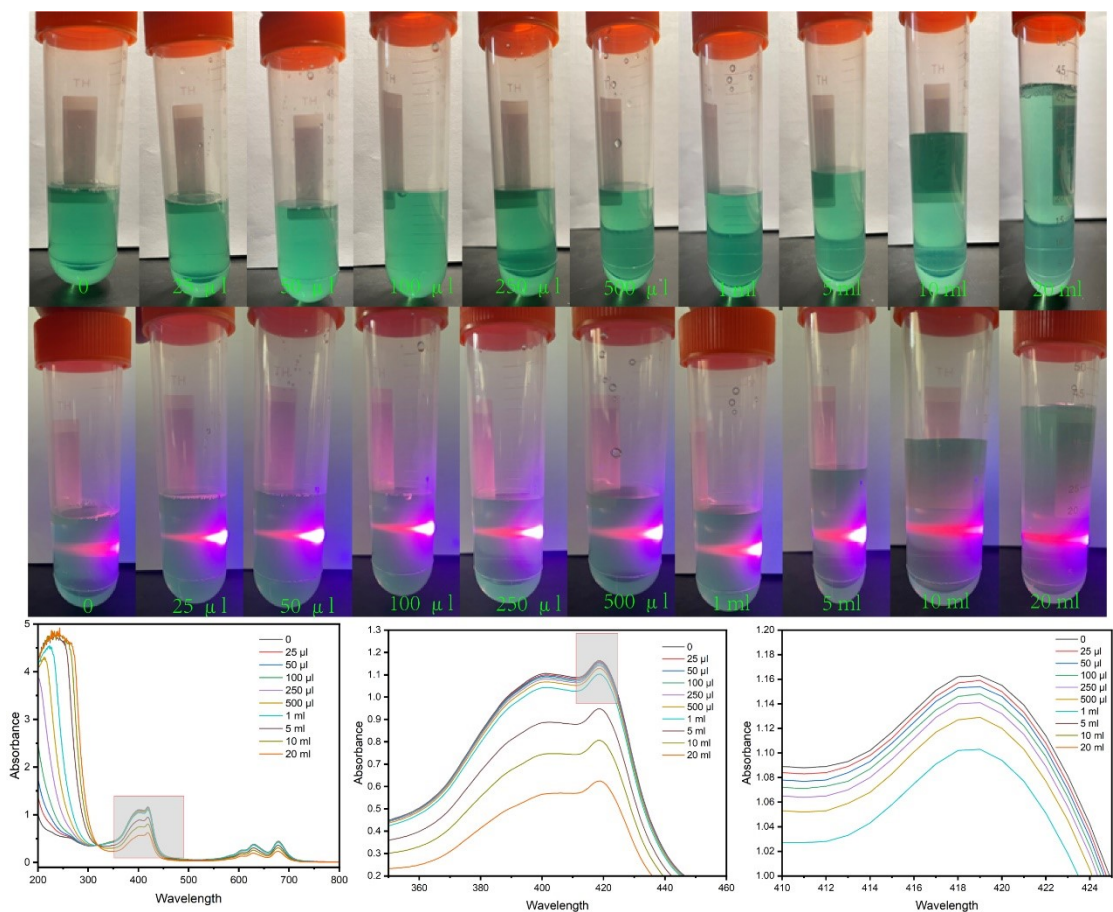

**Figure S6** The apparent digital images, the sample images excited by 405nm laser, and UV-vis after adding different volumes of 5w% H<sub>2</sub>O<sub>2</sub> solutions

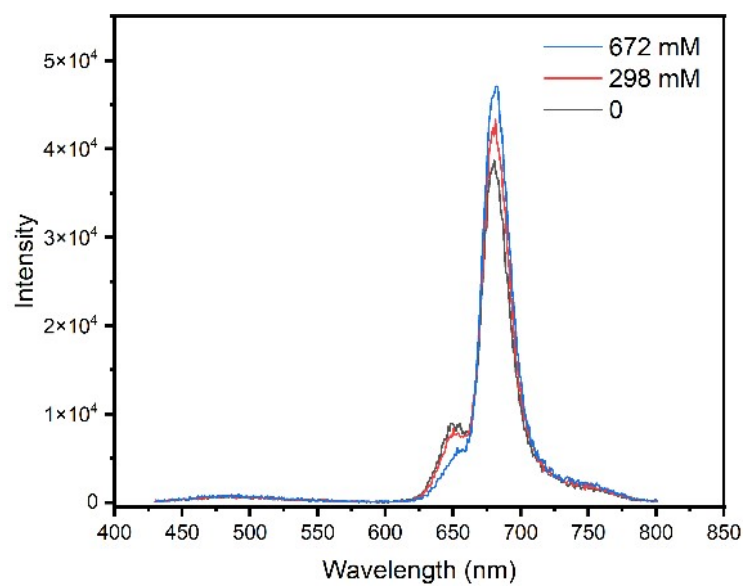

**Figure S7 PL spectra of R-CD in H<sub>2</sub>O<sub>2</sub> solutions with different concentrations**
